# Supplementary material for: Enhanced adsorption of malathion and phoxim by a three-dimensional magnetic graphene oxide-functionalized citrus peel-derived bio-composite
Source: Royal Society of Chemistry journal article supplement (doi:10.1039/d1ay00498k), 2021-01-01
Supplement: d1ay00498k1.pdf [file d1ay00498k1.pdf]

## Supplementary materials

for

### Enhanced adsorption of malathion and phoxim by a three-dimensional magnetic graphene oxide-functionalized citrus peel-derived bio-composite

Shurui Cao<sup>a,b,\*</sup>, Yue Zhou<sup>c</sup>, Cunxian Xi<sup>d</sup>, Tiantian Tang<sup>c</sup>, Zhiqiong Chen<sup>c</sup>

<sup>a</sup>*Forensic Identification Center, Southwest University of Political Science and Law, Chongqing 401120, China*

<sup>b</sup>*Criminal Investigation School, Southwest University of Political Science and Law, Chongqing 401120, China*

<sup>c</sup>*College of Pharmacy, Chongqing Medical University, Chongqing 400016, China*

<sup>d</sup>*The Inspection Technical Center of Chongqing Customs, Chongqing 400020, China*

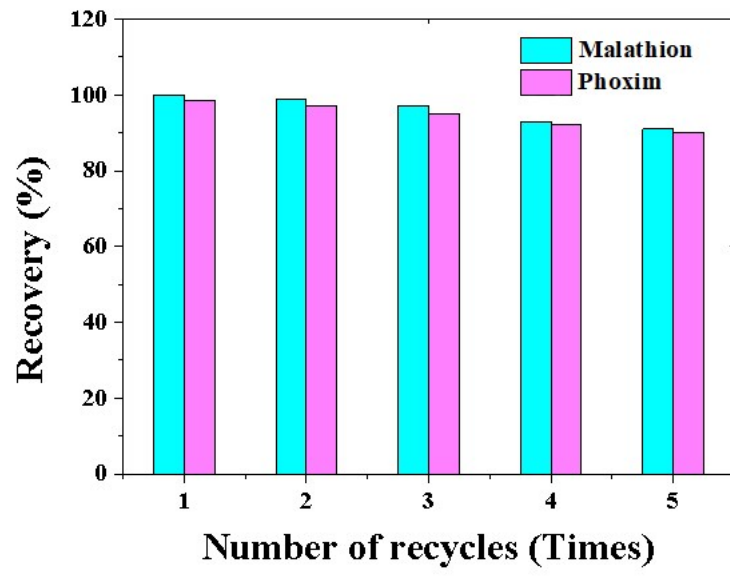

**Fig. S1.** Reusability of mGOBC adsorbents.

Table S1 The R, LOD and LOQ of two OPP in broccoli, lettuce and tomato.

| Pesticides | R        |         |        | LOD ( $\mu\text{g kg}^{-1}$ ) |         |        | LOQ ( $\mu\text{g kg}^{-1}$ ) |         |        |
|------------|----------|---------|--------|-------------------------------|---------|--------|-------------------------------|---------|--------|
|            | Broccoli | Lettuce | Tomato | Broccoli                      | Lettuce | Tomato | Broccoli                      | Lettuce | Tomato |
| Malathion  | 0.999    | 0.998   | 0.996  | 0.01                          | 0.03    | 0.02   | 0.03                          | 0.11    | 0.09   |
| Phoxim     | 0.999    | 0.997   | 0.998  | 0.13                          | 0.09    | 0.11   | 0.43                          | 0.32    | 0.35   |

Table S2 The accuracy and precision for the determination of two OPP in vegetable samples (n=6).

| Pesticides | Concentration<br>( $\mu\text{g kg}^{-1}$ ) | Accuracy     |         |        | Intra-day RSD<br>(%) |         |        | Inter-day RSD<br>(%) |         |        |
|------------|--------------------------------------------|--------------|---------|--------|----------------------|---------|--------|----------------------|---------|--------|
|            |                                            | Recovery (%) |         |        | Broccoli             | Lettuce | Tomato | Broccoli             | Lettuce | Tomato |
|            |                                            | Broccoli     | Lettuce | Tomato |                      |         |        |                      |         |        |
| Malathion  | 2                                          | 101.6        | 99.5    | 100.3  | 1.8                  | 2.6     | 5.4    | 1.9                  | 2.8     | 5.1    |
|            | 5                                          | 99.2         | 95.8    | 96.6   | 3.2                  | 6.9     | 4.8    | 2.0                  | 5.9     | 4.5    |
|            | 10                                         | 100.3        | 99.0    | 98.1   | 4.6                  | 3.1     | 3.4    | 1.1                  | 3.2     | 3.8    |
| Phoxim     | 2                                          | 99.6         | 95.4    | 97.2   | 0.6                  | 5.9     | 0.3    | 1.2                  | 6.1     | 5.4    |
|            | 5                                          | 99.4         | 89.8    | 99.5   | 1.0                  | 6.4     | 1.4    | 2.0                  | 5.9     | 6.2    |
|            | 10                                         | 97.1         | 99.3    | 99.3   | 2.6                  | 2.8     | 3.2    | 0.5                  | 3.3     | 6.8    |

Table S3 Residues in real vegetable samples ( $\mu\text{g kg}^{-1}$ )

| Compounds      | Pesticides | Concentration<br>( $\mu\text{g kg}^{-1}$ ) | Spiked level<br>( $\mu\text{g kg}^{-1}$ ) | Recovery<br>(%) |
|----------------|------------|--------------------------------------------|-------------------------------------------|-----------------|
| Broccoli       | malathion  | ND                                         | 5                                         | 96.31           |
|                | phoxim     | ND                                         | 5                                         | 98.35           |
| Lettuce        | malathion  | 0.02                                       | 5                                         | 98.31           |
|                | phoxim     | ND                                         | 5                                         | 89.73           |
| Tomato         | malathion  | ND                                         | 5                                         | 97.24           |
|                | phoxim     | ND                                         | 5                                         | 96.36           |
| Cowpea         | malathion  | ND                                         | 5                                         | 92.75           |
|                | phoxim     | ND                                         | 5                                         | 94.62           |
| Purple cabbage | malathion  | 0.03                                       | 5                                         | 99.34           |
|                | phoxim     | ND                                         | 5                                         | 93.91           |

Table S4 Comparisons of food sample preparation methods.

| Sample         | adsorbent                                          | Adsorption capability (mg g <sup>-1</sup> )                  | Recovery (%) | LOD (µg kg <sup>-1</sup> ) | RSD (%)     | Reference   |
|----------------|----------------------------------------------------|--------------------------------------------------------------|--------------|----------------------------|-------------|-------------|
| Vegetables     | mGOBC                                              | 25.26 for malathion<br>42.31 for phoxim                      | 89.8-101.6   | 0.01-0.13                  | 0.3-6.9     | This method |
| Milk           | M-RACNTs                                           | 1.61 for malathion                                           | No data      | 0.36-0.95                  | 10.47-19.85 | [45]        |
| Water          | COF                                                | 21.3 for phosalone<br>23.3 for phosmet<br>18.8 for coumaphos | 72.8-111.0   | 0.02-0.63                  | 0.5-11.4    | [46]        |
| Vegetable oils | MIP                                                | 1.00 for malathion                                           | 73-99        | 0.08-0.6                   | No data     | [47]        |
| Water          | GCS                                                | 4.88 for malathion                                           | -            | -                          | -           | [42]        |
| Water          | G/Fe <sub>3</sub> O <sub>4</sub> @SiO <sub>2</sub> | -                                                            | 89.3–117.2   | 10–24                      | 0.5-10.5    | [48]        |

M-RACNTs: Magnetic restricted-access carbon nanotubes

COF: Magnetic covalent organic framework

MIP: Molecular imprinting
